# Supplementary material for: In Vitro Investigation of Binding Interactions between Albumin–Gliclazide Model and Typical Hypotensive Drugs
Source: MDPI journal article supplement (doi:10.3390/ijms23010286), 2021-12-28
Supplement: s1 [file s1]

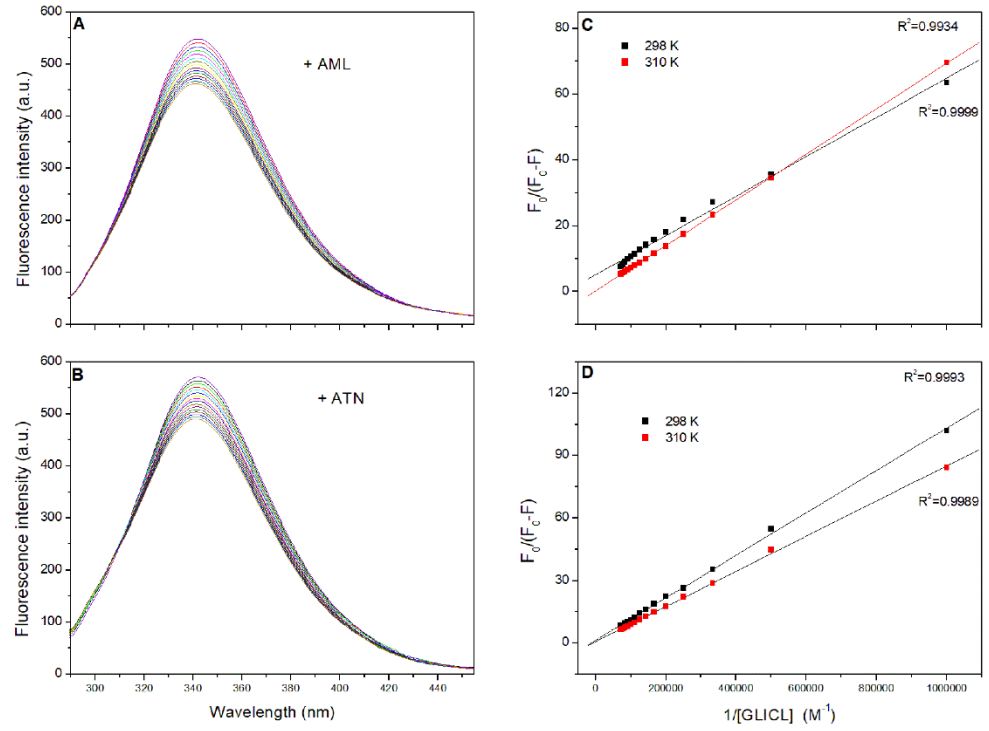

**Figure S1.** Fluorescence quenching spectra of BSA incubated with different concentrations of gliclazide (0–14  $\mu\text{M}$ ) in the presence of (A) amlodipine besylate (AML) and (B) atenolol (ATN) at excitation 280 nm, and corresponding Stern–Volmer plots (C, D).

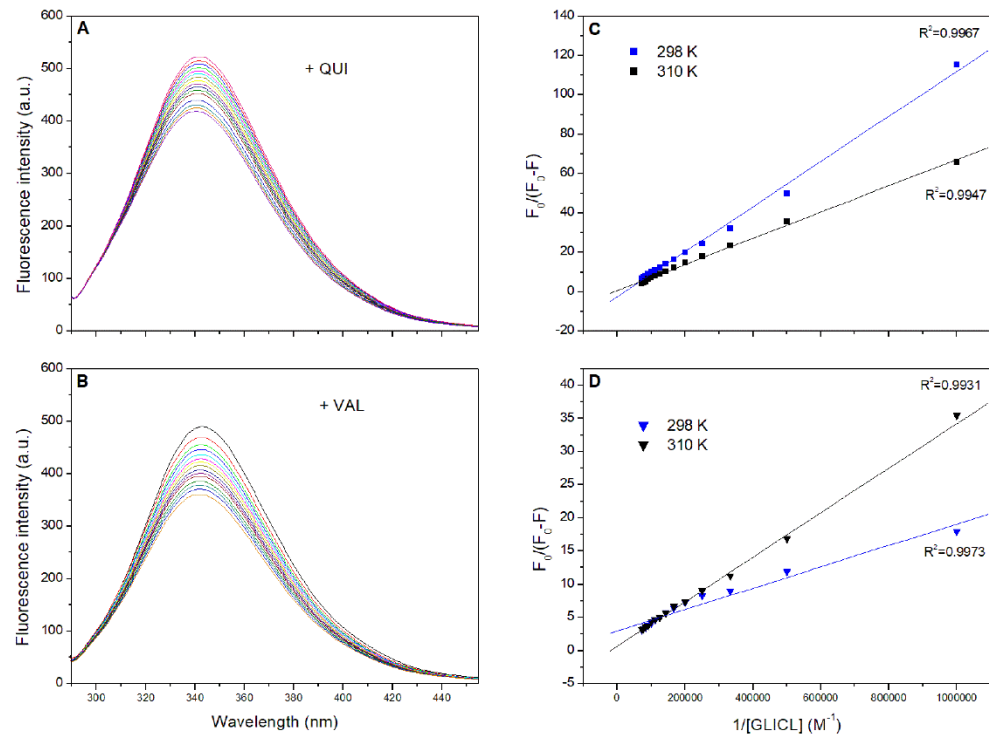

**Figure S2.** Fluorescence quenching spectra of BSA incubated with different concentrations of gliclazide (0–14  $\mu\text{M}$ ) in the presence of (A) quinapril hydrochloride (QUI) and (B) valsartan (VAL) at excitation 280 nm, and corresponding Stern–Volmer plots (C, D).

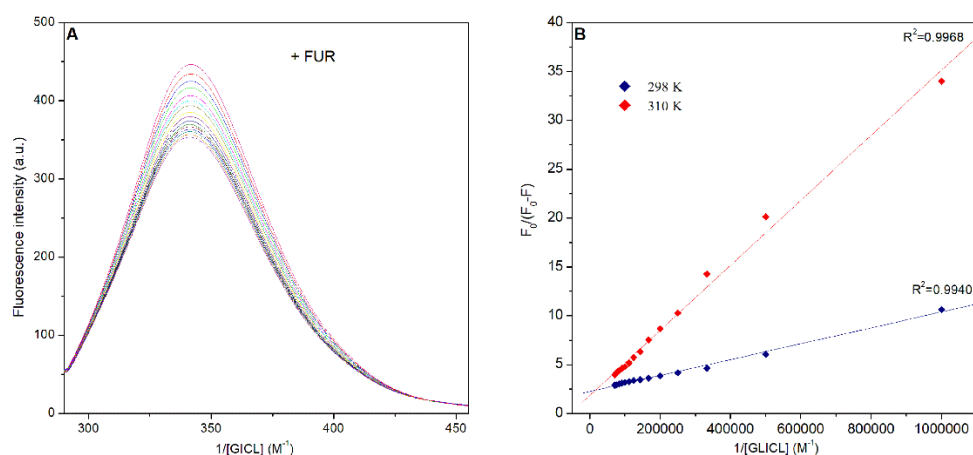

**Figure S3.** (A) Fluorescence quenching spectra of BSA incubated with different concentrations of gliclazide (0–14  $\mu\text{M}$ ) in the presence of furosemide (FUR) at excitation 280 nm, and corresponding Stern–Volmer plot (B).

**Table S1.** The effect of the ligands (ATN, AML, QUI, VAL, and FUR) on the  $\alpha$ -helix content of the BSA–GLICL complex after incubation at 310 K. Molar ratio (BSA):(Ligand) = 1:4, (BSA):(GLICL) = 1:7.

| BSA Complex          | $\alpha$ -Helix Content (%) | Decreased $\alpha$ -Helix (%) |
|----------------------|-----------------------------|-------------------------------|
| BSA                  | 68.7                        | -                             |
| BSA-ATN              | 68.2                        | 0.5                           |
| <b>BSA-ATN-GLICL</b> | <b>66.5</b>                 | <b>2.2</b>                    |
| BSA-VAL              | 67.7                        | 1.0                           |
| <b>BSA-VAL-GLICL</b> | <b>65.2</b>                 | <b>3.5</b>                    |
| BSA-AML              | 68.0                        | 0.7                           |
| <b>BSA-AML-GLICL</b> | <b>65.1</b>                 | <b>3.6</b>                    |
| BSA-FUR              | 67.3                        | 1.3                           |
| <b>BSA-FUR-GLICL</b> | <b>64.8</b>                 | <b>3.9</b>                    |
| BSA-QUI              | 67.6                        | 1.1                           |
| <b>BSA-QUI-GLICL</b> | <b>63.1</b>                 | <b>5.6</b>                    |
